# Supplementary material
Source: MDPI journal article supplement (https://www.mdpi.com/search?q=insects-10-00304)
Supplement: s001 [file insects-10-00304-s001.pdf]

# Supplemental Material

## Changes in Indoor Insecticide Residue Levels after Adopting an Integrated Pest Management Program to Control German Cockroach Infestations in an Apartment Building

Changlu Wang,<sup>\*1</sup> Amanda Eiden,<sup>1</sup> Richard Cooper,<sup>1</sup> Chen Zha,<sup>1</sup> Desen Wang,<sup>2</sup> and Ed Reilly<sup>3</sup>

\* Corresponding author. E-mail: changluw@rutgers.edu.

<sup>1</sup> Department of Entomology, Rutgers University, New Brunswick, NJ 08901.

<sup>2</sup> Key Laboratory of Bio-Pesticide Innovation and Application of Guangdong Province, Department of Entomology, College of Agriculture, South China Agricultural University, Guangzhou 510642, Guangdong Province, China

<sup>3</sup> New Jersey Department of Environmental Protection, Trenton, NJ 08625

### Quality Assurance/ Quality Control

All samples in this study were spiked with two surrogates to monitor both the extraction and analysis efficiency. Dibutyl chlorendate and triphenyl phosphate were the two surrogates added to each sample at approximately 12 µg each. Laboratory blanks and matrix blanks were analyzed along with the surface wipe samples as controls. Sample spikes consisting of all the insecticide analytes at eight different concentration levels throughout the working range were used to determine the recovery of each insecticide. The insecticide neat standards were obtained from the EPA pesticide repository located in Fort Meade Maryland. Purity of the analytical standards are shown in Table S1. Stock standards were prepared from the neat standards at a concentration of approximately 400 µg/ml in ethyl acetate. Intermediate insecticide standard mixtures were prepared from the individual stock standards at a concentration of approximately 40 µg/ml for each insecticide analyte. The amounts added for each insecticide in the eight concentration levels were as follows: 0.2 µg, 0.4 µg, 0.6 µg, 0.8 µg, 1.0 µg, 2.0 µg, 4.0 µg, 5.0 µg. Since pyrethrin is a multi-component insecticide analyte, higher spike concentrations were used. The eight concentration levels for pyrethrin were as follows: 1.0 µg, 2.0 µg, 3.0 µg, 4.0 µg, 5.0 µg, 10 µg, 20 µg, 25 µg. The average recovery and relative standard deviation for each insecticide analyte based on thirty-two spiked samples can be found in Table S2. The average recovery and relative standard deviation for the two surrogates which were based on 309 samples can also be found in Table S2.

The sample analysis utilized an external standard technique with calibration curves consisting of six concentration points for insecticide analyte and a linear regression algorithm was used for quantification. The method and instrument detection limits are also listed for each insecticide analyte in the table above. EPA pesticide external standard methods for water samples such as method 608 was used as a model for the analysis of the swab samples.

The extraction procedure is like surface wipe extractions performed by Federal Insecticide Fungicide Rodenticide Act (FIFRA) state laboratories for pesticide enforcement cases. The United States Environmental Protection Agency Office of Enforcement and Compliance Monitoring generated the "NEIC Pesticide Sampling Guide" which was used as a model for this study. This guide was generated in August 1985 by Robert F. Schneider for the National Enforcement Investigations Center which was in Denver, Colorado.

Qualitative identification of insecticide analytes in samples were confirmed when the relative abundance of characteristic ions in the mass spectrum of both the standard and the sample agreed

within 20% absolute abundance. For example, if a characteristic ion has a relative abundance of 30% in the standard spectrum, its abundance in the sample spectrum must be in the range of 10 – 50%. In this study there were no qualitative identification of insecticide analytes below the method detection limits (MDL) and if insecticide analytes were qualitatively confirmed below the MDL the quantified value would be reported as the MDL since quantifying in this region would be beyond the linear range.

The MDL was determined by spiking eight blank swab samples with approximately 40 ng of each insecticide analyte for a final concentration of approximately 0.22 ng/cm<sup>2</sup>. The eight spiked samples were analyzed and the standard deviation was determined for each insecticide analyte. Since there were 7 degrees of freedom from the student t test the standard deviation for each insecticide analyte were multiplied by 2.998 to generate the MDL values. The instrument detection limits were determined for each insecticide analyte by obtaining the peak height of three times the signal to noise level and comparing it to the peak height of the lowest concentration data point in the calibration curve to generate the value.

The column pressure setpoint was adjusted to 6894.7 pascals at a constant flow rate setting to produce a linear velocity of 100 cm/sec and a flow rate of 13.2 ml/min. The injector temperature was set to 523°K and a splitless injection was used with a split vent of 50ml/min at 0.7min. The mass spectrometer ion source was set at 503°K and the temperature of the quadrupole was 423°K. The transfer line leading to the mass spectrometer was set at 883°K. Elution of the insecticide analytes from the GC column occurred through the temperature program that ranged from 323°K to 573°K over a 7-minute chromatographic run.

**Table 1.** Purity of insecticide analytical standards used in the study.

| Insecticide Standard   | 2016              |        | 2017          |        |
|------------------------|-------------------|--------|---------------|--------|
|                        | Lot Number        | Purity | Lot Number    | Purity |
| Chlorfenapyr           | L76-56            | 0.996  | L76-56        | 0.996  |
| Chlorpyrifos           | TSN100227         | 0.998  | IWS-80227-47  | 1      |
| Fipronil               | 52200301          | 0.991  | 52200301      | 0.991  |
| Indoxacarb             | JW 062 181        | 0.996  | JW 062 181    | 0.996  |
| Pyriproxyfen           | A51723b           | 0.998  | AS1723b       | 0.997  |
| Pyrethrin              | AA8729            | 0.194  | AA8729        | 0.194  |
| Allethrin              | C150523           | 1      | C150523       | 1      |
| Cyfluthrin             | 208200502         | 0.492  | 208200502     | 0.492  |
| Cypermethrin           | SZBC047XV         | 0.943  | 575597        | 0.994  |
| Deltamethrin           | 23983             | 0.936  | 902200301     | 0.994  |
| Esfenvalerate          | B656-058 0035 739 | 0.987  | WS-S-FV-07001 | 0.986  |
| Imiprothrin            | C151029           | 0.991  | C151029       | 0.991  |
| Permethrin             | 713200501         | 0.484  | 410559        | 0.997  |
| Phenothrin             | C150325           | 1      | C150325       | 1      |
| Resmethrin             | 1029200311        | 0.998  | 1029200311    | 0.998  |
| Tetramethrin           | 23983             | 0.936  | 23983         | 0.936  |
| $\lambda$ -Cyhalothrin | 4230400           | 0.995  | 4230400       | 0.995  |
| MGK-264                | AB4552            | 0.952  | AB4552        | 0.952  |

**Table 2.** Recovery of insecticide analytes and two surrogates from spiked samples.

| Spiked Analytes     | Average  | Relative Standard | Method Detection            |                                                  |
|---------------------|----------|-------------------|-----------------------------|--------------------------------------------------|
|                     | Recovery | Deviation         | Limit (ng/cm <sup>2</sup> ) | Instrument Detection Limit (ng/cm <sup>2</sup> ) |
| Chlorfenapyr        | 88.90%   | 15.40%            | 0.66                        | 0.039                                            |
| Chlorpyrifos        | 81.90%   | 14.10%            | 0.71                        | 0.05                                             |
| Fipronil            | 83.30%   | 22.40%            | 0.93                        | 0.14                                             |
| Indoxacarb          | 91.80%   | 10.90%            | 0.49                        | 0.13                                             |
| Pyriproxyfen        | 87.40%   | 20.70%            | 0.9                         | 0.016                                            |
| Pyrethrin           | 89.90%   | 14.50%            | 0.83                        | 0.18                                             |
| Allethrin           | 83.60%   | 12.20%            | 0.55                        | 0.031                                            |
| Cyfluthrin          | 92.20%   | 17.20%            | 0.5                         | 0.16                                             |
| Cypermethrin        | 94.50%   | 15.80%            | 0.5                         | 0.15                                             |
| Deltamethrin        | 94.50%   | 13.90%            | 0.43                        | 0.13                                             |
| Esfenvalerate       | 87.70%   | 15.70%            | 0.71                        | 0.13                                             |
| Imiprothrin         | 103%     | 21.00%            | 0.89                        | 0.065                                            |
| Permethrin          | 89.70%   | 17.10%            | 0.61                        | 0.044                                            |
| Phenothrin          | 85.70%   | 18.00%            | 0.68                        | 0.028                                            |
| Resmethrin          | 81.30%   | 9.31%             | 0.46                        | 0.031                                            |
| Tetramethrin        | 85.00%   | 14.50%            | 0.49                        | 0.042                                            |
| Λ-Cyhalothrin       | 83.10%   | 22.70%            | 1.1                         | 0.051                                            |
| MGK-264             | 84.60%   | 11.80%            | 0.43                        | 0.047                                            |
| Dibutyl Chlorendate | 84.40%   | 11.40%            |                             |                                                  |
| Triphenyl phosphate | 89.70%   | 15.60%            |                             |                                                  |

**Table 3.** Changes of insecticide residue level in apartments from 2016 to 2017.

| Insecticide            | Mean Change |                       |                                      | Statistics*          |
|------------------------|-------------|-----------------------|--------------------------------------|----------------------|
|                        | n           | (ng/cm <sup>2</sup> ) | Standard Error (ng/cm <sup>2</sup> ) |                      |
| Chlorfenapyr           | 7           | 7.41                  | 1.47                                 | t = 5.0; P = 0.002   |
| Indoxacarb             | 12          | 0.72                  | 2.17                                 | S = 19; P = 0.15     |
| Cyfluthrin             | 7           | -0.57                 | 0.59                                 | t = -0.97, P = 0.37  |
| Cypermethrin           | 32          | 5.65                  | 1.89                                 | S = 197, P < 0.0001  |
| Deltamethrin           | 17          | 5.19                  | 1.74                                 | S = 64.5, P = 0.001  |
| Imiprothrin            | 14          | 10.55                 | 3.09                                 | S = 52.5, P = 0.0001 |
| Permethrin             | 32          | 1.4                   | 0.46                                 | S = 198, P < 0.0001  |
| Phenothrin             | 4           | 2.03                  | 2.12                                 | t = 0.96, P = 0.41   |
| Tetramethrin           | 3           | 27.33                 | 10.93                                | t = 2.5; P = 0.13    |
| $\lambda$ -cyhalothrin | 20          | 0.63                  | 0.58                                 | S = 38.5; P = 0.16   |
| MGK-264                | 13          | 9.63                  | 4.64                                 | S = 31.5, P = 0.03   |

\* Paired student t test was used for data that are normally distributed. Wilcoxon signed rank test was used for data that are not normally distributed. Non-normally distributed data were not transformed before analysis.
